# Supplementary material
Source: PubMed Central journal article supplement (PMC3938923)
Supplement: Supp_Figure2.pdf [file Supp_Figure2.pdf]

### Osteogenic Beacon Persistence in MG-63 Cells

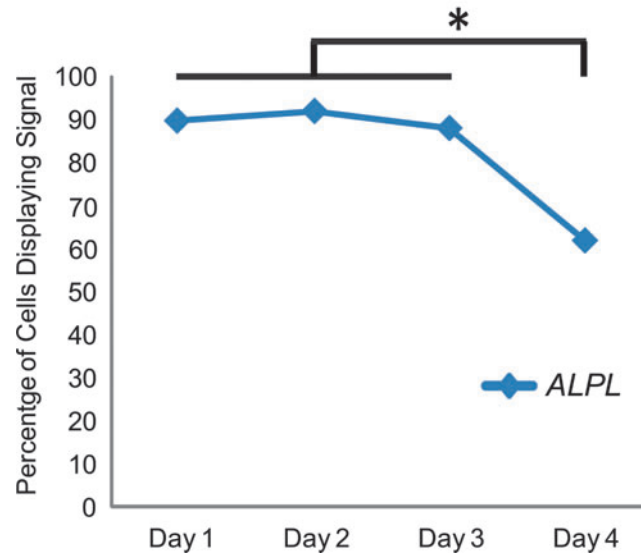

**SUPPLEMENTARY FIG. S2.** MG-63 osteosarcoma cells were treated with *ALPL* molecular beacons and monitored daily for 4 days to assess persistence of the DNA-based probes in live cells. Beacon signal remained consistent for days 1–3 but decreased by >30% between days 3 and 4 ( $*p < 0.05$ ).
