# Supplementary material
Source: PubMed Central journal article supplement (PMC3938923)
Supplement: Supp_Figure3.pdf [file Supp_Figure3.pdf]

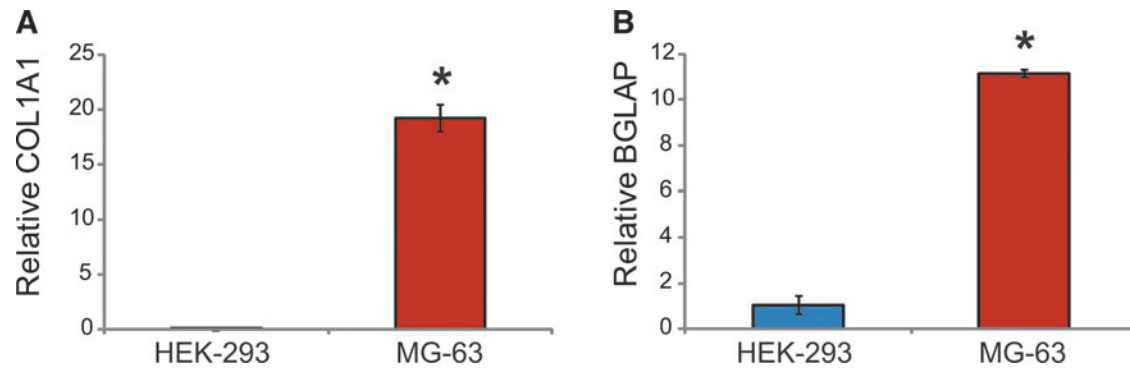

**SUPPLEMENTARY FIG. S3.** MG-63 cells exhibited significantly greater mRNA copy numbers for the osteogenic genes *COL1A1* (A) and *BGLAP* (B) compared with HEK-293 cells ( $p < 0.001$ ). The elevated *COL1A1* and *BGLAP* mRNA levels, as measured by real-time quantitative polymerase chain reaction, corroborated molecular beacon data showing that an overwhelmingly higher percentage of MG-63 cells positively expressed osteogenic genes compared with HEK-293 cells.
